# Supplementary material for: A Bibliometric Analysis of 8271 Publications on Thyroid Nodules From 2000 to 2021
Source: PubMed Central journal article supplement (PMC9068984; doi:10.3389/fendo.2022.845776), 2022-04-21
Supplement: Image_1.pdf [file Image_1.pdf]

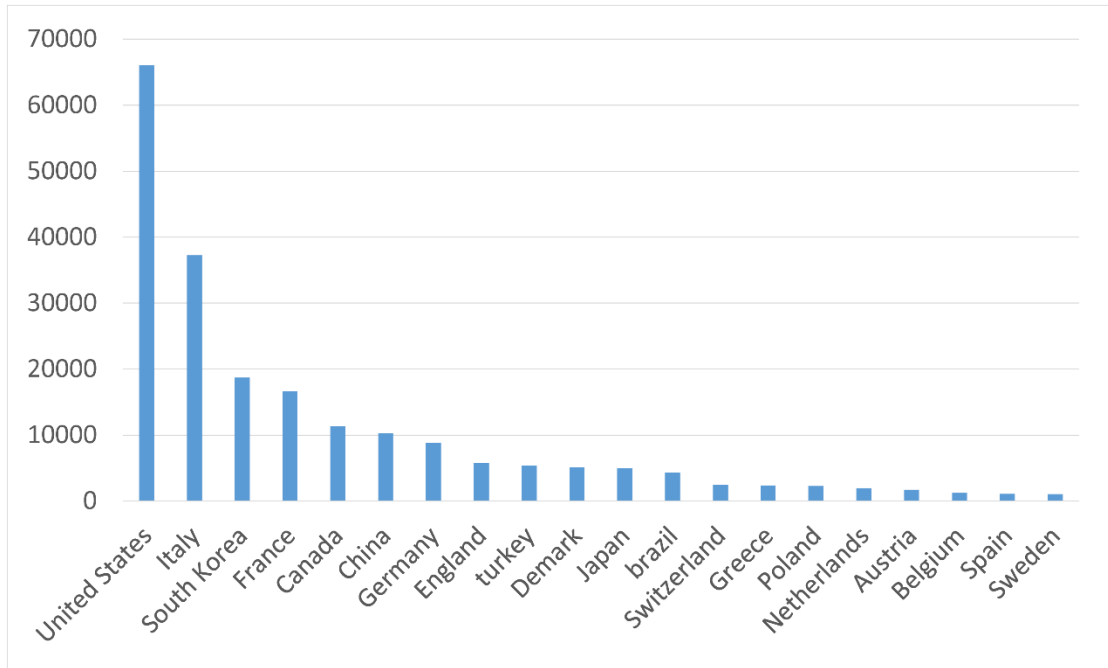

Supplementary figure1:Top 20 countries with the most cited medical publications.
